# Supplementary material for: Prevalence of Excess Sodium Intake and Their Corresponding Food Sources in Adults from the 2017–2018 Brazilian National Dietary Survey
Source: MDPI journal article supplement (doi:10.3390/nu14194018), 2022-09-28
Supplement: s1 [file s1]

**Figure S1.** Sample flowchart in the 2017-2018 Household Budget Survey eligible for the present study

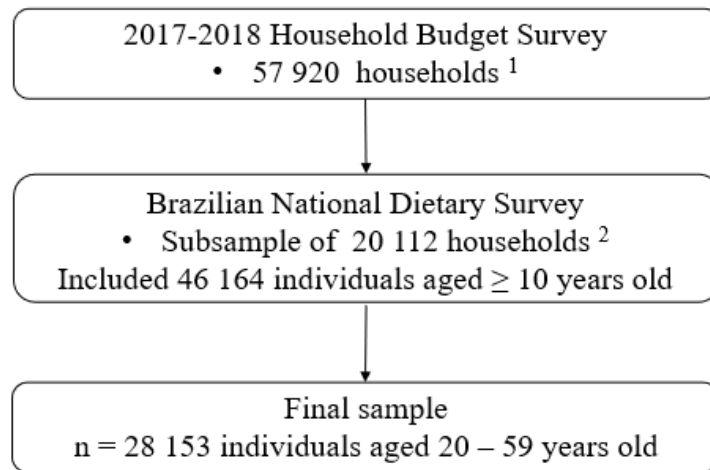

<sup>1</sup> Households selected at random from the pre-defined stratification system. An average loss of 15% was estimated due to possible refusals to answer the survey, and this same proportion was added to the final number of households to minimize possible losses.

<sup>2</sup> Households selected at random from the pre-defined stratification system.

**Table S1.** Frequency of consumption and list of foods that were included in each food group for adults of the 2017-2018 Household Brazilian Budget Survey.

| Food Group                     | Food group content example                                                     | Prevalence of consumers (%) |
|--------------------------------|--------------------------------------------------------------------------------|-----------------------------|
| Water                          | Water tap, bottled water, mineral water, sparkling water                       | 86.2                        |
| Coffee                         | Brew coffee, instant coffee, cappuccino, decaffeinated coffee, espresso coffee | 85.3                        |
| White rice                     | Cooked white rice, with or without salt                                        | 83.4                        |
| Sugar and honey                | White or brown sugar, sweeteners, honey                                        | 77.9                        |
| Beans                          | Black beans, brown beans, white beans, pinto beans                             | 72.4                        |
| White bread and toast          | French bread, Italian bread, loaf bread, buns, toast                           | 61.0                        |
| Leafy and non-leafy vegetables | Tomato, carrot, spinach, chayote, eggplant, okra, pumpkin, chard               | 57.2                        |
| Beef                           | Steak beef, ground beef, beef ribs (all cooking methods)                       | 55.7                        |
| Juices                         | Fruit juices or commercial juices                                              | 50.2                        |
| Poultry meat                   | Chicken, turkey, duck, goose (all cooking methods)                             | 48.1                        |
| Butter and Margarine           | Butter and margarine (salted or unsalted, regular or light)                    | 47.0                        |
| Fruits                         | Fresh fruits, fruit salad, dried fruits                                        | 36.6                        |
| Pasta                          | Cooked noodles, gnocchi, lasagna, cannelloni, ravioli, with or without sauce   | 34.7                        |
| Cookies and crackers           | Cookies without fillings or toppings, salt crackers                            | 31.9                        |
| Soft drinks                    | Fruit-flavored drinks, cola and noncola soft drinks                            | 25.6                        |
| Sweets and candies             | Chocolate, puddings, ice creams, sweet rolls, milk candy, peanut brittle       | 24.5                        |
| Roots and tubers               | Potato, sweet potatoes, cassava, yam (all cooking methods)                     | 22.7                        |
| Eggs and omelets               | Chicken eggs, quail eggs, omelets (all cooking methods)                        | 22.5                        |
| Sandwiches                     | Hot dog, hamburger sandwich, cold cuts sandwiches, wrap                        | 21.1                        |
| Flours                         | Corn flour, tapioca flour, fried manioca flour (farofa)                        | 20.8                        |

|                              |                                                                                                                                                     |      |
|------------------------------|-----------------------------------------------------------------------------------------------------------------------------------------------------|------|
| Vegetables oils              | Olive oil, soybean oil, sunflower oil                                                                                                               | 20.4 |
| Cake                         | White cake, chocolate cake, carrot cake, sponge cake, with or without topping and filling                                                           | 18.2 |
| Cheese                       | White or yellow                                                                                                                                     | 16.6 |
| Dairy products and beverages | Yogurt, kefir, milk smoothie, fermented dairy drinks                                                                                                | 16.1 |
| Salty pastries               | Croquette, croissant, Italian focaccia, fried or baked pastry                                                                                       | 15.4 |
| Corn-based mixed dishes      | Cooked cornmeal, grits, sweet corn mush, cooked hominy                                                                                              | 13.8 |
| Meat-based mixed dishes      | Stroganoff, minced meat roulade, fish stew, stuffed chicken                                                                                         | 13.3 |
| Rice-based mixed dishes      | Rice with chicken, risotto, fried rice                                                                                                              | 12.6 |
| Sausages and hot dogs        | Sausages, frankfurters, hot dogs                                                                                                                    | 12.3 |
| Fish and Seafood             | Fish, shrimps, crab, oyster, squid, canned sardine, canned tuna                                                                                     | 12.2 |
| Soups and broth              | Soups with or without beans, noodles, rice, corn meal and vegetables; instant soups                                                                 | 11.4 |
| Pork meat                    | Pork chop, pork ribs, pork loin (all cooking methods)                                                                                               | 11.3 |
| Sauces and spices            | Tomato sauce, white sauce, ketchup, mayonnaise, salad dressing, vinegar, salt, ground pepper                                                        | 9.8  |
| Tea                          | Green, black, herbal, chamomile tea                                                                                                                 | 9.4  |
| Other mixed dishes           | Grits with ground beef, potato salad, stuffed eggplant, Shepherd's pie, cabbage rolls (with cereals, beans, legumes, meat and/or other ingredients) | 9.1  |
| Milk and milk alternatives   | Whole, low-fat, skimmed, fortified milks and soy beverages                                                                                          | 8.6  |
| Alcoholic beverages          | Fermented and distilled alcoholic beverages                                                                                                         | 7.8  |
| Beans-based mixed dishes     | Brazilian black beans stew (feijoada), cassoulet, mixed beans salad                                                                                 | 7.7  |
| Cold cuts                    | Ham, mortadella, salami, roast beef                                                                                                                 | 6.7  |
| Pizza and calzones           | Calabrese pizza, mozzarella pizza, vegetarian pizza, calzones                                                                                       | 5.9  |
| Brown bread and toast        | Rye bread, multi-grain bread and toast, whole wheat bread and toast                                                                                 | 4.8  |
| Organ meats                  | Liver, intestine, kidney, stomach (pork, beef, and poultry)                                                                                         | 4.6  |
| Cured meats                  | Bacon, jerked beef, salted meat                                                                                                                     | 3.4  |
| Popcorn                      | Sweet or salty, with or without butter, regular or microwaved                                                                                       | 3.1  |
| Brown rice                   | Cooked brown rice, three grain rice, seven grain rice, with or without salt                                                                         | 3.0  |

|                                 |                                                                                    |     |
|---------------------------------|------------------------------------------------------------------------------------|-----|
| Cereals                         | Corn flakes, granola bars, oats, wheat, breakfast cereal, quinoa                   | 3.0 |
| Flavored Snacks                 | Potatoes chips, corn chips, flavored chips                                         | 2.6 |
| Nuts and Seeds                  | Almonds, Brazil nuts, cashew nuts, pumpkin seeds, sesame seeds, linseed            | 2.1 |
| Salty pies                      | Chicken pie, cheese pie, quiche                                                    | 1.9 |
| Other legumes                   | Cooked soybeans, lentils, chickpeas, snow peas                                     | 1.7 |
| Flavored powder                 | Chocolate, strawberry artificially flavored powders                                | 1.6 |
| Other non-alcoholic beverages   | Coconut water, sugarcane juice, energy drink, sports drinks                        | 1.3 |
| Canned vegetables               | Olives, canned peas, canned corn, sauerkraut, canned hearts of palm, mushrooms     | 1.1 |
| Not included in a food category | Coconut milk, guarana powder, barley powder, diet shake powder, protein supplement | 0.7 |

---

**Table S2.** Geographic region distribution according to food security status based on the Household Budget Survey 2017-2018, Brazil <sup>1</sup>.

| Geographic region | Brazilian Food Insecurity Scale (EBIA) |              |                      |              |                                    |              | p <sup>2</sup> |
|-------------------|----------------------------------------|--------------|----------------------|--------------|------------------------------------|--------------|----------------|
|                   | Food security                          |              | Mild food insecurity |              | Moderate or severe food insecurity |              |                |
|                   | %                                      | (95% CI)     | %                    | (95% CI)     | %                                  | (95% CI)     |                |
| North             | 37.9                                   | (34.3, 41.8) | 32.7                 | (29.2, 36.5) | 29.3                               | (25.5, 33.3) | <0.001         |
| Northeast         | 46.6                                   | (44.7, 48.5) | 31.9                 | (30.3, 33.6) | 21.5                               | (19.9, 23.0) |                |
| Southeast         | 65.0                                   | (62.3, 67.6) | 26.4                 | (24.1, 29.0) | 8.6                                | (7.4, 9.9)   |                |
| South             | 76.9                                   | (74.1, 79.4) | 18.1                 | (15.9, 20.6) | 4.9                                | (3.9, 6.2)   |                |
| Midwest           | 63.3                                   | (59.9, 66.6) | 25.3                 | (22.5, 28.3) | 11.4                               | (9.4, 13.8)  |                |

<sup>1</sup> All the analyses took into account the sampling survey design.

<sup>2</sup> Differences of frequencies (%) across food security status were evaluated using Pearson's Chi-square test adjusted for the complex sampling design.
